# Supplementary material for: Police Involvement in Involuntary Psychiatry Admission: A Report From the Dublin Involuntary Admission Study
Source: Atypon-hosted journal article supplement (doi:10.1176/appi.ps.201900614), 2020-10-14
Supplement: appi.ps.201900614.ds001.pdf [file appi.ps.201900614.ds001.pdf]

**Supplemental Material**

**Criteria for involuntary admission under Ireland’s Mental Health Act 2001 among involuntary patients for whom police made the application for involuntary admission compared to those for whom police did not make the application for involuntary admission**

| <b>Criteria for involuntary admission under Ireland’s Mental Health Act 2001</b> |                                                                                                                                                                                      | <b>Involuntary patients for whom police made the application for involuntary admission (N)</b> | <b>%</b> | <b>Involuntary patients for whom police did not make the application for involuntary admission (N)</b> | <b>%</b> |
|----------------------------------------------------------------------------------|--------------------------------------------------------------------------------------------------------------------------------------------------------------------------------------|------------------------------------------------------------------------------------------------|----------|--------------------------------------------------------------------------------------------------------|----------|
| <b>Risk criterion</b>                                                            | “Because of the illness, disability or dementia, there is a serious likelihood of the person concerned causing immediate and serious harm to himself or herself or to other persons” | 7                                                                                              | 11%      | 14                                                                                                     | 5%       |
| <b>Treatment criterion</b>                                                       | “Because of the severity of the                                                                                                                                                      | 30                                                                                             | 48%      | 180                                                                                                    | 68%      |

|  |                                                                                                                                                                                                                                                                                                                                                                                                                                                                                                                                                                                                                      |  |  |  |  |
|--|----------------------------------------------------------------------------------------------------------------------------------------------------------------------------------------------------------------------------------------------------------------------------------------------------------------------------------------------------------------------------------------------------------------------------------------------------------------------------------------------------------------------------------------------------------------------------------------------------------------------|--|--|--|--|
|  | <p>illness,<br/>disability or<br/>dementia, the<br/>judgment of the<br/>person<br/>concerned is so<br/>impaired that<br/>failure to admit<br/>the person to an<br/>approved centre<br/>would be likely<br/>to lead to a<br/>serious<br/>deterioration in<br/>his or her<br/>condition or<br/>would prevent<br/>the<br/>administration<br/>of appropriate<br/>treatment that<br/>could be given<br/>only by such<br/>admission”, <i>and</i><br/>“the reception,<br/>detention and<br/>treatment of the<br/>person<br/>concerned in an<br/>approved centre<br/>would be likely<br/>to benefit or<br/>alleviate the</p> |  |  |  |  |
|--|----------------------------------------------------------------------------------------------------------------------------------------------------------------------------------------------------------------------------------------------------------------------------------------------------------------------------------------------------------------------------------------------------------------------------------------------------------------------------------------------------------------------------------------------------------------------------------------------------------------------|--|--|--|--|

|                      |                                                |    |     |    |     |
|----------------------|------------------------------------------------|----|-----|----|-----|
|                      | condition of that person to a material extent” |    |     |    |     |
| <b>Both criteria</b> | As above                                       | 25 | 40% | 71 | 27% |

**Notes**

For this analysis, N=327

Pearson Chi-Square = 8.94; p=0.011

**Voluntary and involuntary psychiatry admission rates and percentages: Ireland  
(national data) and study area (Tallaght University Hospital and Mater Misericordiae  
University Hospital)**

|                                                                             | <b>Variable</b> | <b>Ireland <sup>a</sup></b><br><i>(1 January 2017 to<br/>31 December 2017,<br/>inclusive)</i> | <b>Tallaght University<br/>Hospital and Mater<br/>Misericordiae<br/>University Hospital</b><br><i>(1 July 2015 to 31<br/>December 2018,<br/>inclusive)</i> |
|-----------------------------------------------------------------------------|-----------------|-----------------------------------------------------------------------------------------------|------------------------------------------------------------------------------------------------------------------------------------------------------------|
| <b>Number of<br/>admissions per<br/>100,000<br/>population per<br/>year</b> | All admissions  | 351.6                                                                                         | 250.4                                                                                                                                                      |
|                                                                             | Voluntary       | 306.2                                                                                         | 209.6                                                                                                                                                      |
|                                                                             | Involuntary     | 45.4                                                                                          | 40.8                                                                                                                                                       |
| <b>Percentage of<br/>admissions that<br/>were involuntary</b>               | Both genders    | 13%                                                                                           | 16%                                                                                                                                                        |
|                                                                             | Male            | 15%                                                                                           | 18%                                                                                                                                                        |
|                                                                             | Female          | 11%                                                                                           | 15%                                                                                                                                                        |

**Notes**

<sup>a</sup> Daly A, Craig S (14).

**Psychiatry admission rates and diagnoses stratified by admission status (voluntary or involuntary): Ireland (national data) and study area (Tallaght University Hospital and Mater Misericordiae University Hospital)**

|                                                            | <b>Rate of admission per 100,000 population per year</b>                              |                    |                                                                                                                                        |                    |
|------------------------------------------------------------|---------------------------------------------------------------------------------------|--------------------|----------------------------------------------------------------------------------------------------------------------------------------|--------------------|
|                                                            | <b>Ireland <sup>a</sup></b><br><i>(1 January 2017 to 31 December 2017, inclusive)</i> |                    | <b>Tallaght University Hospital and Mater Misericordiae University Hospital</b><br><i>(1 July 2015 to 31 December 2018, inclusive)</i> |                    |
| <b>Diagnosis</b>                                           | <b>Voluntary</b>                                                                      | <b>Involuntary</b> | <b>Voluntary</b>                                                                                                                       | <b>Involuntary</b> |
| <b>Organic mental disorders</b>                            | 7.9                                                                                   | 1.8                | 2.2                                                                                                                                    | 0.9                |
| <b>Alcohol disorders</b>                                   | 23.3                                                                                  | 0.8                | 6.9                                                                                                                                    | 0.3                |
| <b>Other drug disorders</b>                                | 15.9                                                                                  | 2.9                | 17.1                                                                                                                                   | 2.6                |
| <b>Schizophrenia, schizotypal and delusional disorders</b> | 53.7                                                                                  | 18.0               | 45.7                                                                                                                                   | 24.7               |

|                                              |       |      |       |      |
|----------------------------------------------|-------|------|-------|------|
| <b>Affective disorders</b>                   | 113.6 | 13.1 | 57.9  | 8.6  |
| <b>Neurosis</b>                              | 29.1  | 1.1  | 23.0  | 1.2  |
| <b>Personality and behavioural disorders</b> | 27.5  | 2.1  | 27.0  | 0.7  |
| <b>Other and unspecified</b>                 | 35.0  | 5.5  | 26.8  | 1.8  |
| <b>Total</b>                                 | 306   | 45.3 | 206.6 | 40.8 |

**Notes**

<sup>a</sup> Daly A, Craig S (14).

**Characteristics of involuntary patients admitted to Tallaght University Hospital and Mater Misericordiae University Hospital (1 July 2015 to 31 December 2018, inclusive)**

|                          | <b>Variable</b>               | <b>Involuntary patients for whom the police made the application for involuntary admission</b> |     | <b>Involuntary patients for whom the police <i>did not</i> make the application for involuntary admission</b> |     | <b>Pearson Chi Square</b> | <b>p</b> |
|--------------------------|-------------------------------|------------------------------------------------------------------------------------------------|-----|---------------------------------------------------------------------------------------------------------------|-----|---------------------------|----------|
| <b>Gender</b>            | Female                        | 30                                                                                             | 39% | 143                                                                                                           | 46% | 1.321                     | 0.250    |
|                          | Male                          | 48                                                                                             | 62% | 170                                                                                                           | 54% |                           |          |
| <b>Marital status</b>    | Single                        | 55                                                                                             | 75% | 226                                                                                                           | 75% | 2.874                     | 0.719    |
|                          | Married                       | 9                                                                                              | 12% | 39                                                                                                            | 13% |                           |          |
|                          | Separated                     | 6                                                                                              | 8%  | 16                                                                                                            | 5%  |                           |          |
|                          | Divorced                      | 1                                                                                              | 1%  | 5                                                                                                             | 2%  |                           |          |
|                          | Widowed                       | 0                                                                                              | 0%  | 8                                                                                                             | 3%  |                           |          |
|                          | Civil Partner                 | 2                                                                                              | 3%  | 7                                                                                                             | 2%  |                           |          |
|                          |                               |                                                                                                |     |                                                                                                               |     |                           |          |
| <b>Employment status</b> | Student                       | 5                                                                                              | 7%  | 21                                                                                                            | 7%  | 2.477                     | 0.649    |
|                          | Works in the home             | 4                                                                                              | 5 % | 17                                                                                                            | 6%  |                           |          |
|                          | Employed                      | 11                                                                                             | 15% | 39                                                                                                            | 13% |                           |          |
|                          | Unemployed                    | 54                                                                                             | 72% | 216                                                                                                           | 70% |                           |          |
|                          | Retired                       | 1                                                                                              | 1%  | 17                                                                                                            | 6%  |                           |          |
|                          |                               |                                                                                                |     |                                                                                                               |     |                           |          |
| <b>Diagnosis</b>         | Organic disorders             | 2                                                                                              | 3%  | 7                                                                                                             | 2%  | 10.735                    | 0.151    |
|                          | Alcohol disorders             | 0                                                                                              | 0%  | 1                                                                                                             | 0%  |                           |          |
|                          | Drug disorders                | 4                                                                                              | 5%  | 19                                                                                                            | 6%  |                           |          |
|                          | Schizophrenia group disorders | 49                                                                                             | 63% | 199                                                                                                           | 64% |                           |          |
|                          | Affective disorders           | 13                                                                                             | 17% | 67                                                                                                            | 21% |                           |          |
|                          | Neurotic disorders            | 5                                                                                              | 6%  | 4                                                                                                             | 1%  |                           |          |
|                          | Personality disorders         | 0                                                                                              | 0%  | 5                                                                                                             | 2%  |                           |          |
|                          | Other                         | 5                                                                                              | 6%  | 11                                                                                                            | 4%  |                           |          |
|                          |                               |                                                                                                |     |                                                                                                               |     |                           |          |





**Multi-variable analysis of correlates of whether or not a patient's involuntary admission was initiated by the police**

| <b>Variable</b>                                                                    | <b><math>\beta</math></b> | <b>p</b> |
|------------------------------------------------------------------------------------|---------------------------|----------|
| Mental Health Act 2001 criteria under which the patient was involuntarily admitted | -0.230                    | 0.370    |
| Duration of admission                                                              | 0.000                     | 0.570    |
| Constant                                                                           | -36.202                   | 0.591    |

**Note**

$r^2 = 0.6\%$
